# Supplementary material for: Nelfinavir and Nelfinavir Analogs Block Site-2 Protease Cleavage to Inhibit Castration-Resistant Prostate Cancer
Source: Sci Rep. 2015 Apr 16;5:9698. doi: 10.1038/srep09698 (PMC4816264; doi:10.1038/srep09698)
Supplement: Supplementary Information [file srep09698-s1.pdf]

## Nelfinavir and Nelfinavir Analogs Block Site-2 Protease Cleavage to Inhibit Castration-Resistant Prostate Cancer

Min Guan<sup>1</sup>, Leila Su<sup>2</sup>, Yate-Ching Yuan<sup>2</sup>, Haiqing Li<sup>2</sup>, Warren A. Chow<sup>1, 3\*</sup>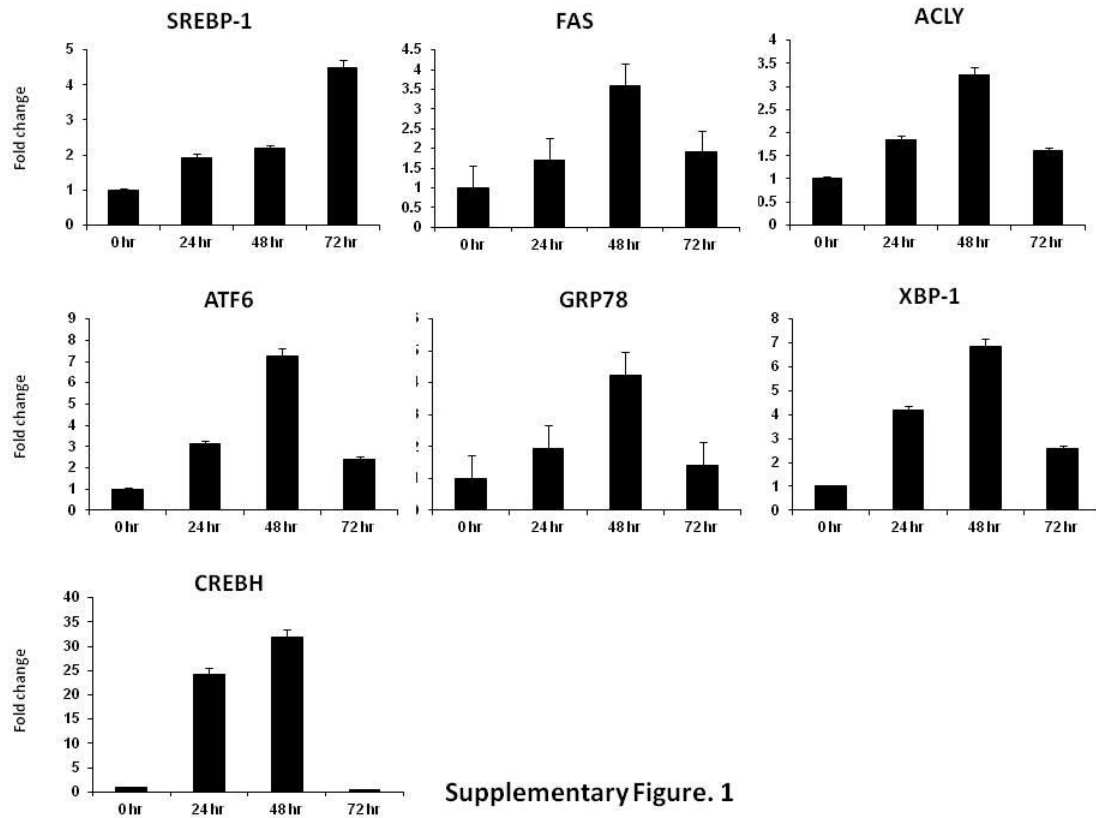

**Supplementary Figure 1. Nelfinavir induces S2P target gene expression.**  
Nelfinavir (10  $\mu$ M) treated DU145 cells were harvested at 0, 24, 48 and 72 hr to extract total RNA to examine gene expression of direct S2P substrates (SREBP-1, ATF6 and CREBH) and their downstream gene targets (FAS, ACLY, GRP78 and XBP-1) by quantitative RT-PCR.

RT-PCR primer sequences:

SREBP-1 5'-gtaaggaagagtcagtgccactgagcat 3'-tatagcctaacacaggggtggagctgaa  
FASN 5'-attgaagtttacaaggagctgcgtctg 3'-taccatgaagctacccagttatcctt  
ACLY 5'-taacttggtagtcagccagaccagctg 3'-aagtggccttgccaactgtggcttctg  
ATF6 5'-aatgagctgcaattggaagcagcaaatg 3'-cgaactgtacagatttggttggtgatgt  
GRP78 5'-tcacaaagacatttgctcctgaagaaat 3'-tattaaaataggctggtacagtaacaac  
XBP-1 5'-ttaaggcgctgaggaggaaactgaaaaa 3'-ggaaagtttttggttctcttctctctaaa  
CREB 5'-tatgctcagaatcaggagttacagagga 3'-aatgtctgggctgacttgctggtggact
